# Supplementary material for: Environmental Characteristics Associated with the Tropical Transition of Mediterranean Cyclones
Source: Copernicus journal article supplement (doi:10.5194/egusphere-2025-3861), 2025-08-20
Supplement: Supplementary file [file egusphere-2025-3861-AC1-supplement.pdf]

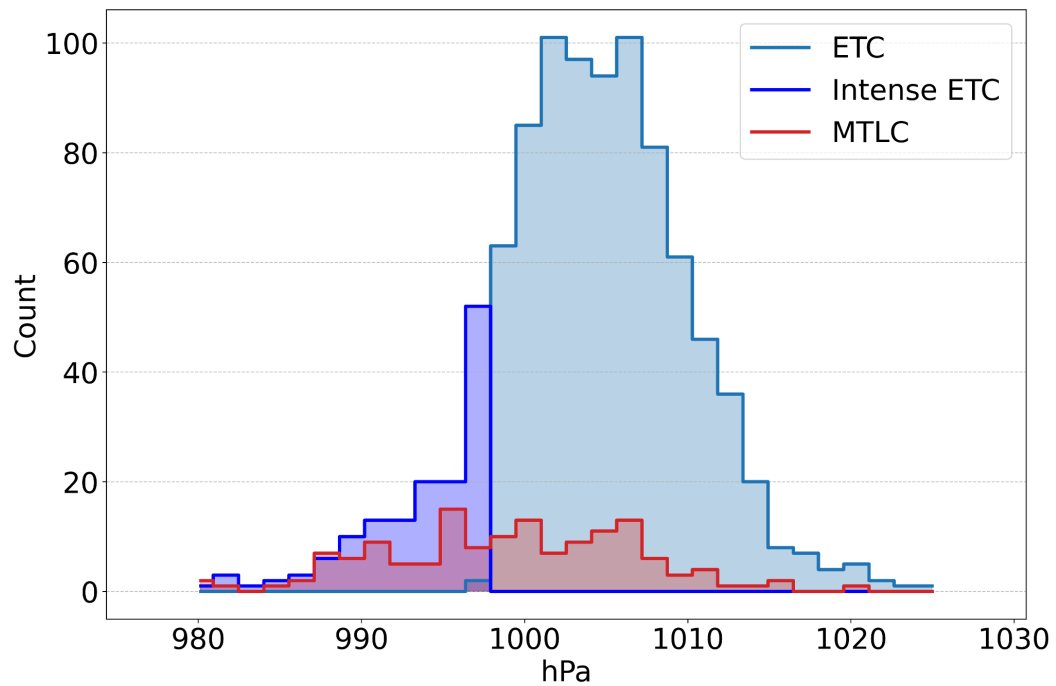

Figure R1: Probability density function of the sea level pressure associated with the center of ETC (blue) and MTLC (red) at the time of their maximum intensity.

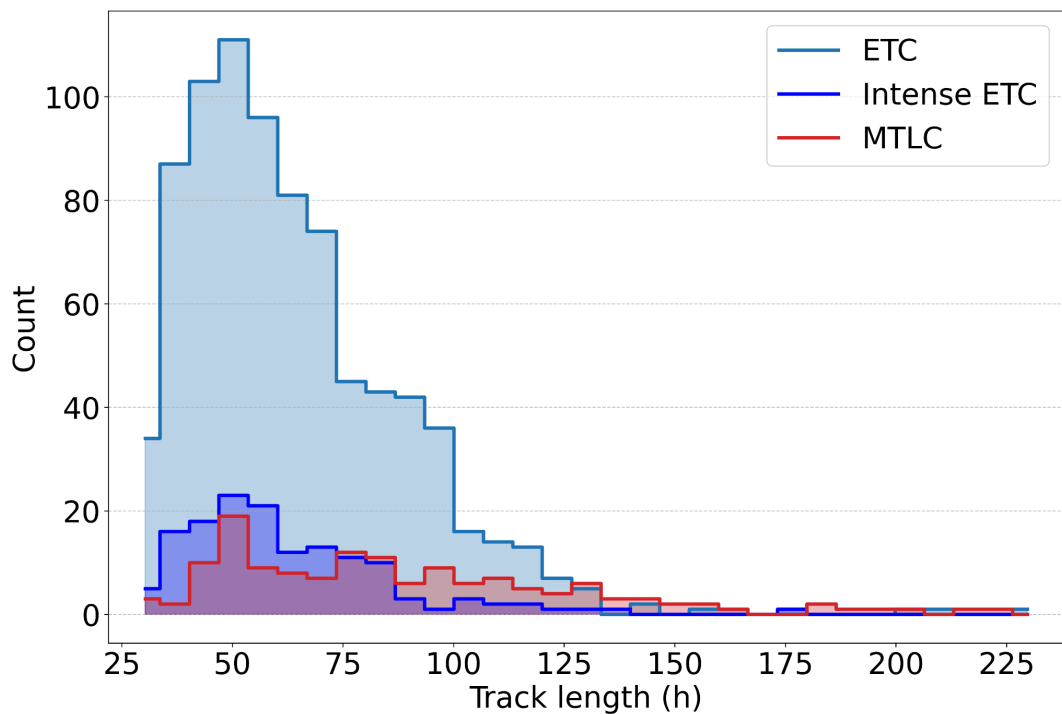

Figure R2: Probability density function of the track length of ETC (blue) and MTLC (red).

## Figures Answer Referee 1

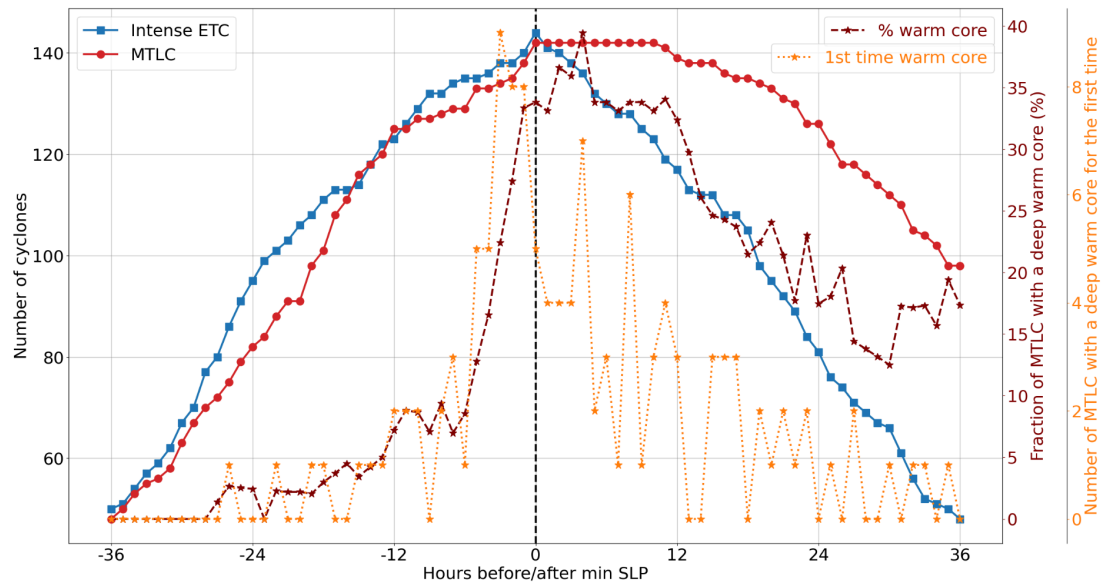

Figure R3: Time evolution with respect to minimum SLP of the number of intense ETC (blue solid line) and MTLC (red solid line), proportion of MTLC that have a warm-core at each time step (maroon dashed line), and number of MTLC that have a deep warm core for the first time (dotted orange line).

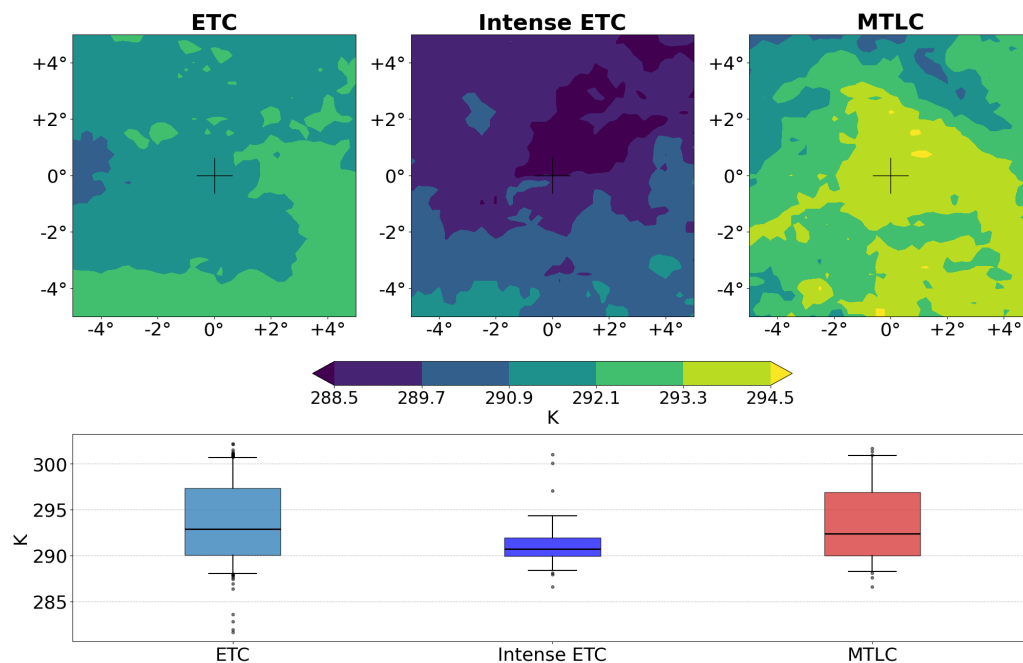

Figure R4: Sea Surface Temperature for the different cyclone classes. Top: 2D composites centered on the cyclones, 36h before the time of minimum SLP. Bottom: boxplots of the mean SST for each cyclone, where the mean is computed on the 10% highest values over the  $10^\circ \times 10^\circ$  box for each cyclone. Whiskers show the 5th–95th percentiles.

## Figures Answer Referee 1

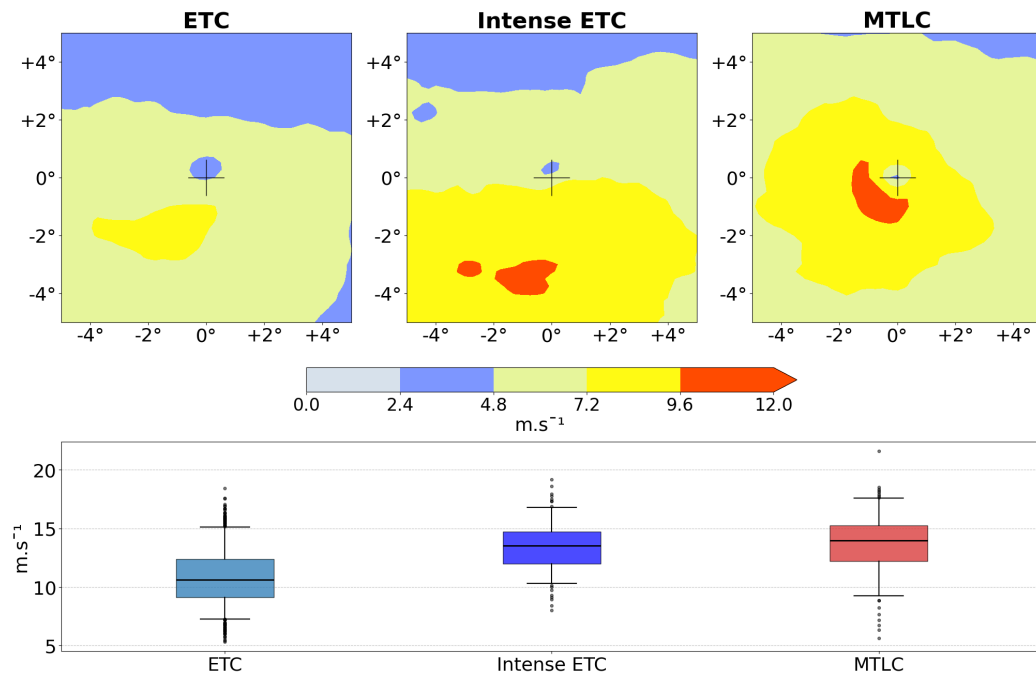

Figure R5: 10m surface wind for the different cyclone classes. Top: 2D composites centered on the cyclones, at the time of minimum SLP. Bottom: boxplots of the mean 10-m wind speed for each cyclone, where the mean is computed on the 10% highest values over the 10°x10° box for each cyclone. Whiskers show the 5th–95th percentiles.

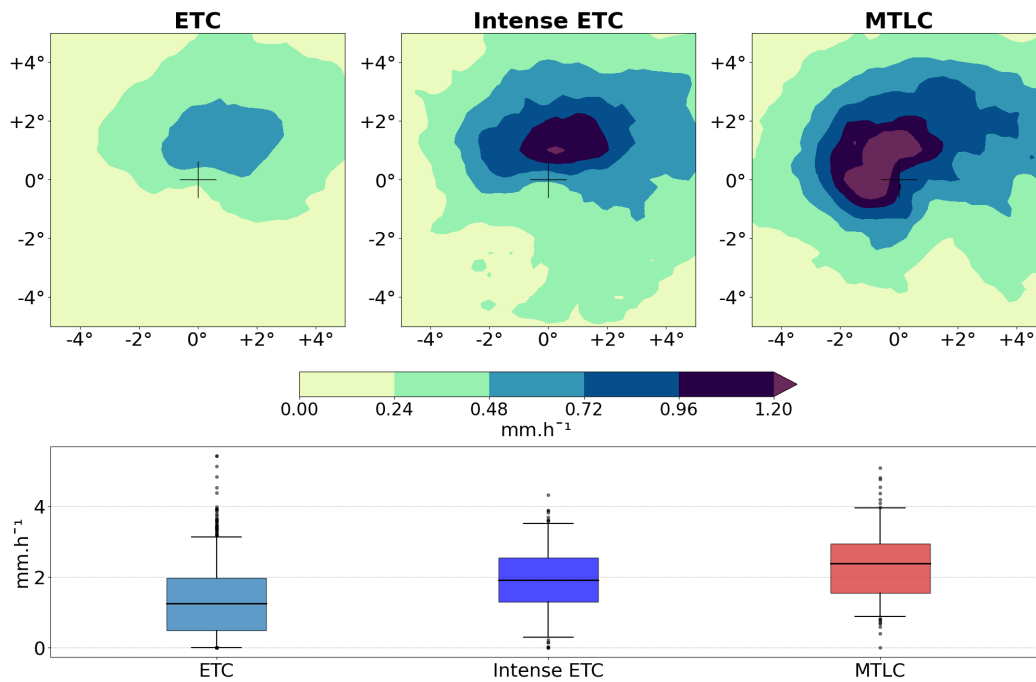

Figure R6: Hourly precipitation for the different cyclone classes. Top: 2D composites centered on the cyclones, at the time of minimum SLP. Bottom: boxplots of the mean

## Figures Answer Referee 1

1-h accumulated precipitation for each cyclone, where the mean is computed on the 10% highest values over the  $10^\circ \times 10^\circ$  box for each cyclone. Whiskers show the 5th–95th percentiles.

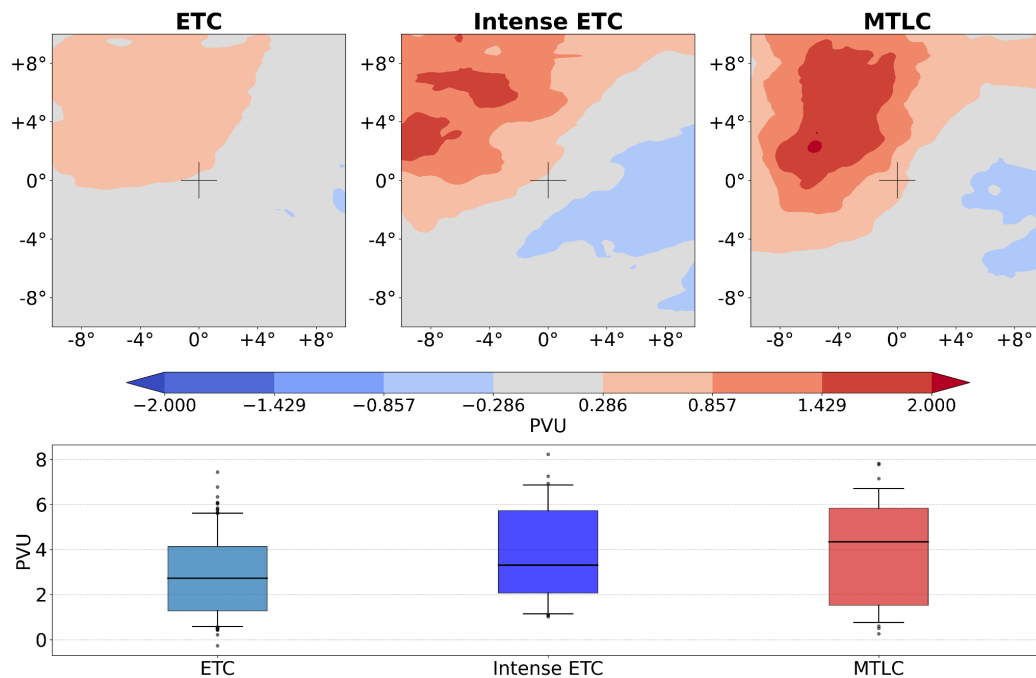

Figure R7: PV anomaly for the different cyclone classes. Top: 2D composites centered on the cyclones, 36h before the time of minimum SLP. Bottom: boxplots of the mean PV anomaly for each cyclone, where the mean is computed on the 10% highest values over the  $10^\circ \times 10^\circ$  box for each cyclone. Whiskers show the 5th–95th percentiles.

## Figures Answer Referee 1

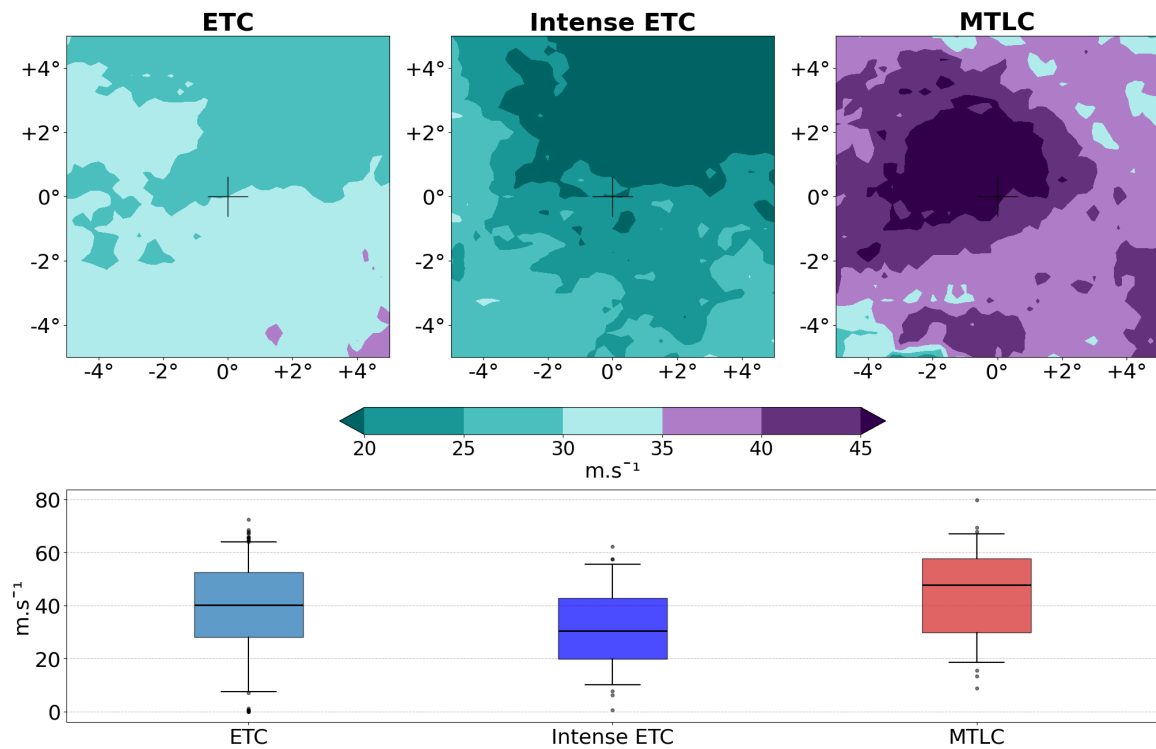

Figure R8: Total PI for the different cyclone classes. Top: 2D composites centered on the cyclones, 36h before the time of minimum SLP. Bottom: boxplots of the mean PI for each cyclone, where the mean is computed on the 10% highest values over the 10°x10° box for each cyclone. Whiskers show the 5th–95th percentiles.

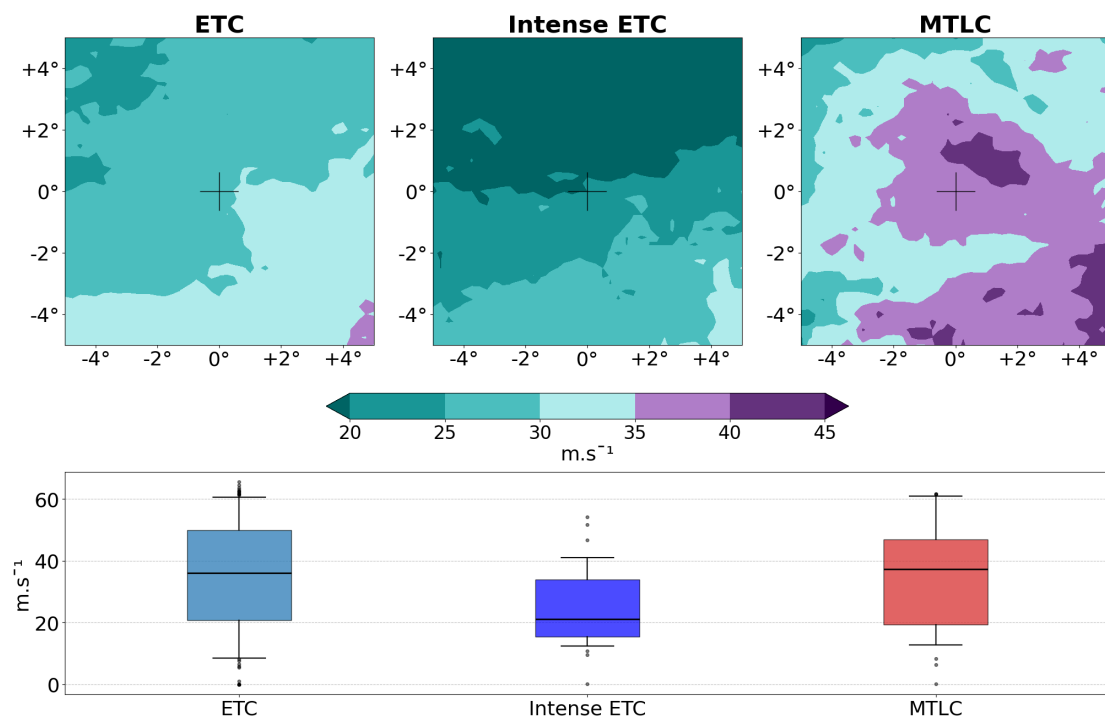

## Figures Answer Referee 1

Figure R9: Climatological PI for the different cyclone classes. Top: 2D composites centered on the cyclones, 36h before the time of minimum SLP. Bottom: boxplots of the mean climatological PI for each cyclone, where the mean is computed on the 10% highest values over the  $10^{\circ}\times 10^{\circ}$  box for each cyclone. Whiskers show the 5th–95th percentiles.

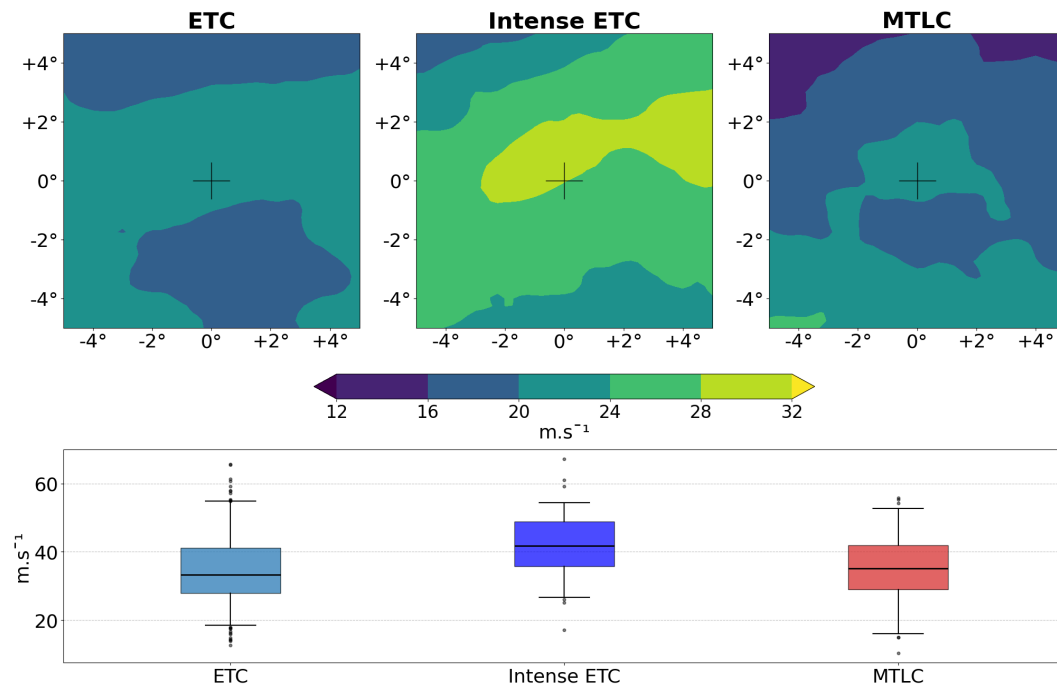

Figure R10: Wind shear for the different cyclone classes. Top: 2D composites centered on the cyclones, 36h before the time of minimum SLP. Bottom: boxplots of the mean wind shear for each cyclone, where the mean is computed on the 10% highest values over the  $10^{\circ}\times 10^{\circ}$  box for each cyclone. Whiskers show the 5th–95th percentiles.
